# Supplementary material for: Protist community composition during early phytoplankton blooms in the naturally iron-fertilized Kerguelen area (Southern Ocean)
Source: Copernicus journal article supplement (doi:10.5194/bg-11-5847-2014), 2014-10-21

Supplement of Biogeosciences, 11, 5847–5863, 2014  
<http://www.biogeosciences.net/11/5847/2014/>  
doi:10.5194/bg-11-5847-2014-supplement  
© Author(s) 2014. CC Attribution 3.0 License.

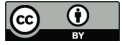

*Supplement of*

## **Protist community composition during early phytoplankton blooms in the naturally iron-fertilized Kerguelen area (Southern Ocean)**

**C. Georges et al.**

*Correspondence to:* U. Christaki ([urania.christaki@univ-littoral.fr](mailto:urania.christaki@univ-littoral.fr))

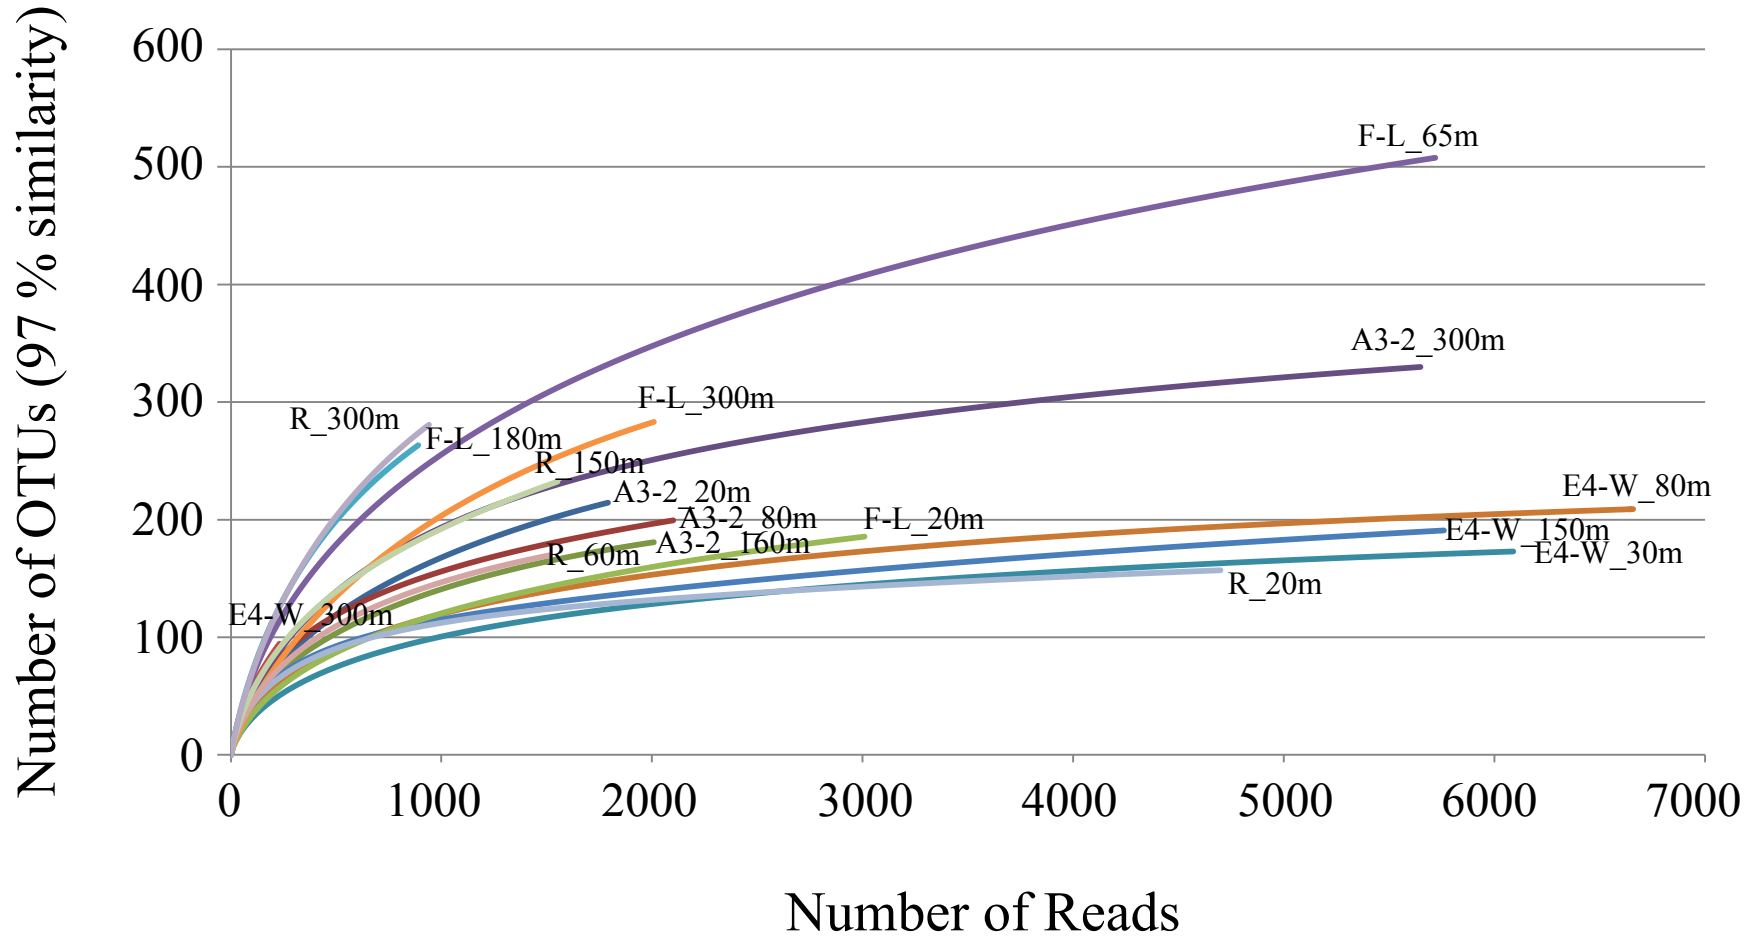

Supplement: Supplementary file 1 [file bg-11-5847-2014-supplement.pdf]
